# Supplementary material for: Evaluation of the thermal effect on separation selectivity in anion-exchange processes using superheated water ion-exchange chromatography
Source: Royal Society of Chemistry journal article supplement (doi:10.1039/c2an16229f), 2012-01-01
Supplement: c2an16229f.pdf [file c2an16229f.pdf]

Electronic Supplementary Information for  
**Evaluation of thermal effect on separation selectivity in anion-exchange processes by  
superheated water ion-exchange chromatography**

Masami Shibukawa,<sup>†\*</sup> Akihiko Taguchi,<sup>‡</sup> Yusuke Suzuki,<sup>‡</sup> Kazunori Saitoh,<sup>‡</sup> Toshihiko Hiaki,<sup>‡</sup> and Takashi Yarita<sup>§</sup>

<sup>†</sup>Graduate School of Science and Technology, Saitama University, 255 Shimo-Okubo, Sakura-ku, Saitama, 338-8570, Japan

<sup>‡</sup>Department of Applied Molecular Chemistry, College of Industrial Technology, Nihon University, 1-2-1, Izumi-cho, Narashino, 275-8575, Japan

<sup>§</sup>National Metrology Institute of Japan, National Institute of Advanced Industrial Science and Technology, Tsukuba Central 3, Umezono, Tsukuba, 305-8563, Japan

\*Corresponding Author. Tel: +81-48-858-3520. Fax: +81-48-858-3520. E-mail:  
[sibukawa@apc.saitama-u.ac.jp](mailto:sibukawa@apc.saitama-u.ac.jp)

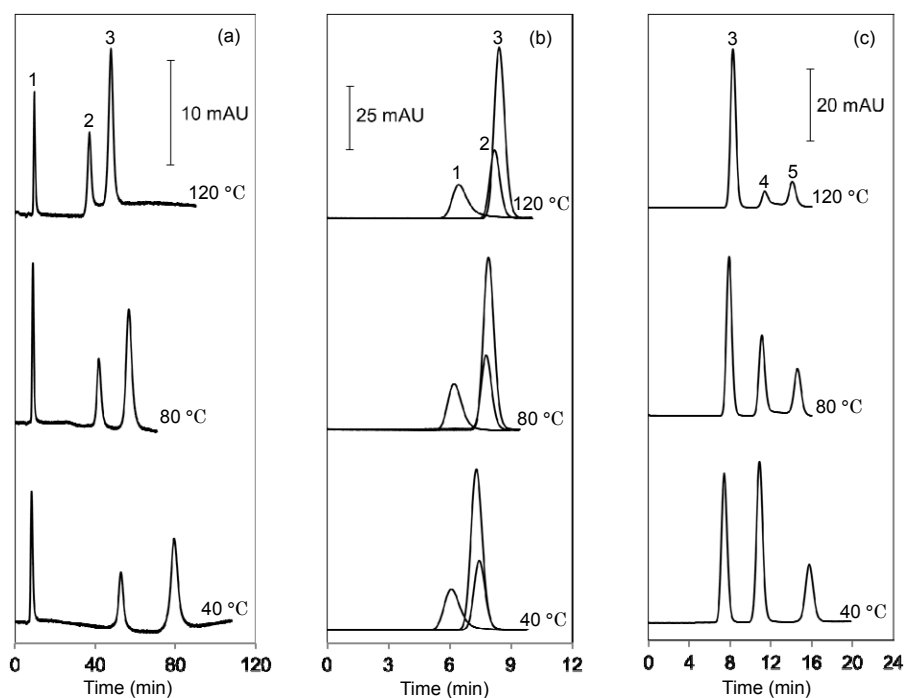

**Fig. S1** Variation of chromatograms for inorganic anions with temperature.

Analytes: 1 =  $\text{IO}_3^-$ , 2 =  $\text{Br}^-$ , 3 =  $\text{NO}_3^-$ , 4 =  $\text{I}^-$ , 5 =  $\text{SCN}^-$ . Eluent: (a)  $0.1 \text{ mol dm}^{-3} \text{ NaCl}$ , (b) and (c)  $0.1 \text{ mol dm}^{-3} \text{ NaClO}_4$ .
